# Supplementary material
Source: MDPI journal article supplement (https://www.mdpi.com/2312-7481/9/3/77)
Supplement: s1 [file s1]

## Supporting Information

# A New Organic Conductor of Tetramethyltetraselenafulvalene (TMTSF) with a Magnetic Dy(III) Complex

Qingyun Wan<sup>1, 2 \*</sup>, Masanori Wakizaka<sup>1 \*</sup>, Haitao Zhang<sup>1</sup>, Yongbing Shen<sup>3</sup>, Nobuto Funakoshi<sup>1</sup>, Shinya Takaishi<sup>1 \*</sup>, Chi-Ming Che<sup>2</sup>, and Masahiro Yamashita<sup>1, 4 \*</sup>

<sup>1</sup> Department of Chemistry, Graduate School of Science, Tohoku University, Aramaki-Aza-Aoba, Aoba-ku, Sendai 980-8578, Japan

<sup>2</sup> Department of Chemistry, State Key Laboratory of Synthetic Chemistry, HKU-CAS Joint Laboratory on New Materials, The University of Hong Kong, Pokfulam Road, Hong Kong, China.

<sup>3</sup> Frontier Institute of Science and Technology (FIST), State Key Laboratory for Mechanical Behavior of Materials, MOE Key Laboratory for Nonequilibrium Synthesis of Condensed Matter, Xi'an Jiaotong University, 99 Yanxiang Road, Xi'an, Shaanxi 710054, China.

<sup>4</sup> School of Materials Science and Engineering, Nankai University, Tianjin 300350, China.

\* Correspondence: qywan@connect.hku.hk (W.Q.); masanori.wakizaka.a7@tohoku.ac.jp (M.W.); shinya.takaishi.d8@tohoku.ac.jp (S.T.); yamasita@agnus.chem.tohoku.ac.jp (M.Y.). Tel.: +81-22-765-6547

Table S1. Summary of the crystal data of compound **1**.

|                                                |                                                                                                                 |
|------------------------------------------------|-----------------------------------------------------------------------------------------------------------------|
| Formula                                        | C <sub>55</sub> H <sub>49</sub> N <sub>6</sub> S <sub>4</sub> Se <sub>20</sub> DyO <sub>6</sub> Cl <sub>3</sub> |
| Formula weight                                 | 2866.29 g/mol                                                                                                   |
| Crystal size (mm <sup>3</sup> )                | 0.1×0.03×0.02                                                                                                   |
| Crystal system                                 | orthorhombic                                                                                                    |
| Space group                                    | <i>Cmc2<sub>1</sub></i>                                                                                         |
| <i>a</i> (Å)                                   | 19.9823(6)                                                                                                      |
| <i>b</i> (Å)                                   | 13.8784(5)                                                                                                      |
| <i>c</i> (Å)                                   | 29.3863(9)                                                                                                      |
| $\alpha$ (°)                                   | 90                                                                                                              |
| $\beta$ (°)                                    | 90                                                                                                              |
| $\gamma$ (°)                                   | 90                                                                                                              |
| <i>V</i> (Å <sup>3</sup> )                     | 8149.5(5)                                                                                                       |
| <i>T</i> (K)                                   | 120                                                                                                             |
| <i>Z</i>                                       | 4                                                                                                               |
| <i>D</i> <sub>calc</sub> (g cm <sup>-3</sup> ) | 2.336                                                                                                           |
| <i>F</i> (000)                                 | 5320.0                                                                                                          |
| $\lambda$ (Mo K $\alpha$ ) (Å)                 | 0.71073                                                                                                         |
| $\mu$ (mm <sup>-1</sup> )                      | 10.098                                                                                                          |
| Reflections collected                          | 49327                                                                                                           |
| Data/restraints/parameters                     | 12224/1/480                                                                                                     |
| GOF on <i>F</i> <sup>2</sup>                   | 1.029                                                                                                           |
| <i>R</i> <sub>int</sub>                        | 0.0447                                                                                                          |
| <i>R</i> <sub>1</sub> <sup>a</sup>             | 0.0655                                                                                                          |
| <i>wR</i> <sub>2</sub> <sup>b</sup> (all data) | 0.0964                                                                                                          |

<sup>a</sup>  $R_1 = \Sigma||F_o| - |F_c||/\Sigma|F_o|$ . <sup>b</sup>  $wR_2 = \{[\Sigma w(F_o^2 - F_c^2)^2]/[\Sigma w(F_o^2)^2]\}^{1/2}$ .

Table S2. A summary of C1-C2 distance in TMTSF-type molecules.

| Ref    | Chemical structure                                       | Average charge of TMTSF | C1-C2 distance            |
|--------|----------------------------------------------------------|-------------------------|---------------------------|
| Ref[1] | TMTSF                                                    | 0                       | 1.347 Å                   |
| Ref[2] | (TMTSF)NO <sub>3</sub>                                   | +1                      | 1.360 Å                   |
| Ref[3] | (TMTSF) <sub>3</sub> (TFPB) <sub>2</sub>                 | +2/3                    | 1.361/1.375/1.363/1.371 Å |
| Ref[4] | (TMTSF) <sub>2</sub> NbF <sub>6</sub>                    | +0.5                    | 1.350 Å                   |
| Ref[5] | (TMTSF) <sub>2</sub> AsF <sub>6</sub>                    | +0.5                    | 1.344 Å                   |
| Ref[6] | (TMTSF) <sub>2</sub> H <sub>2</sub> F <sub>3</sub>       | +0.5                    | 1.357 Å                   |
| Ref[7] | (TMTSF) <sub>2</sub> NO <sub>3</sub>                     | +0.5                    | 1.430 Å                   |
| Ref[8] | (TMTSF) <sub>3</sub> [Y(NO <sub>3</sub> ) <sub>5</sub> ] | +2/3                    | 1.356/1.316 Å             |

TFPB: tetrakis[3,5-bis(trifluoromethyl)phenyl]borate anions.

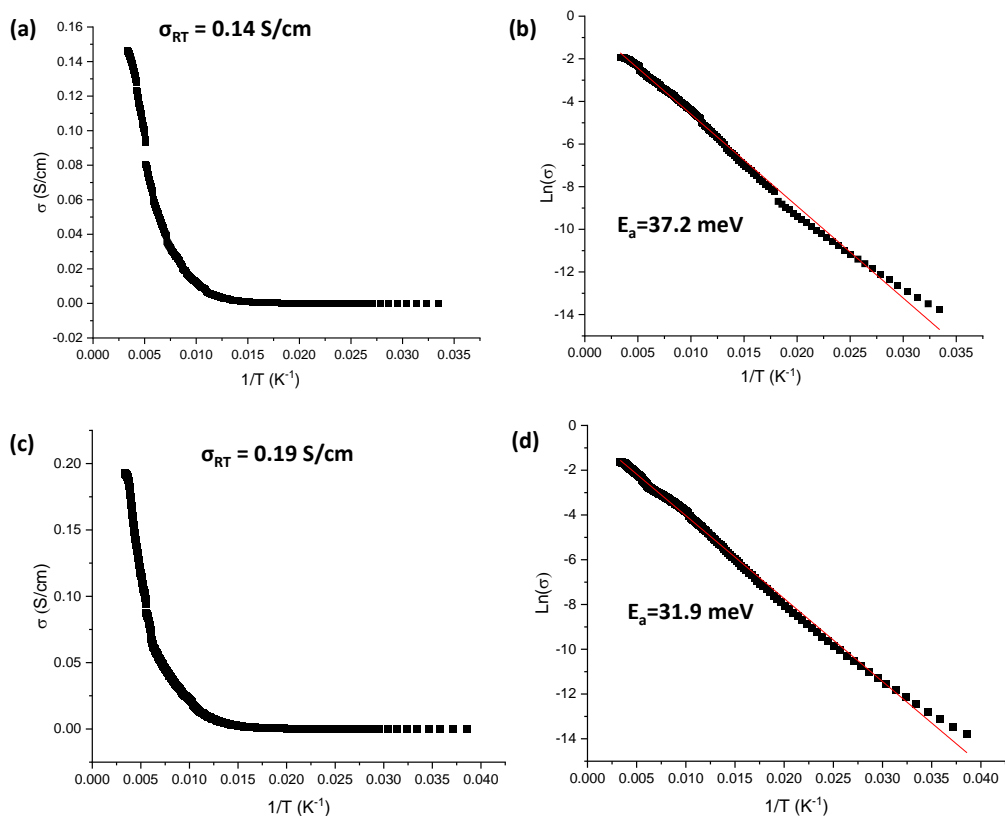

Figure S1. (a and c) Temperature dependence of  $\sigma$  (S·cm<sup>-1</sup>) for two single crystals of **1**. (b and d)  $\ln(\sigma)$ - $T^{-1}$  and its fitting curve to a linear function (red line) of panel a and c, respectively.

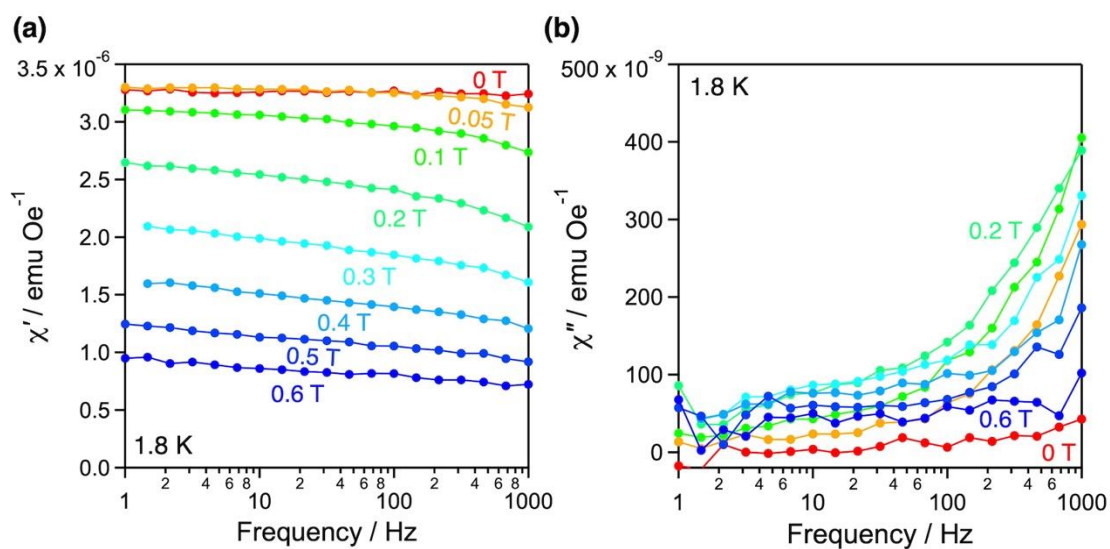

Figure S2. Frequency dependence of (a) the in-phase and (b) the out-of-phase magnetic susceptibility at 1.8 K as a function of the magnetic field of compound **1**.

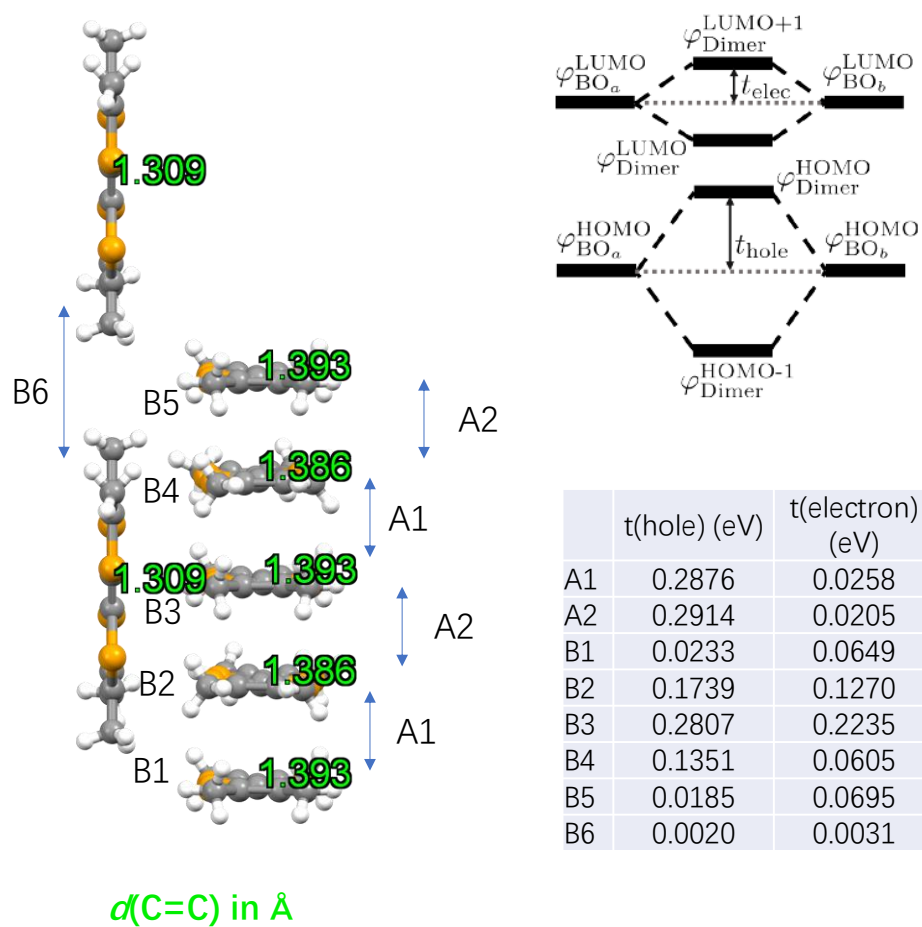

Figure S3. Calculation of charge transfer integral of  $t(\text{hole})$  and  $t(\text{electron})$  in the TMTSF dimers of compound **1**.

## References:

1. Rani, P.; Rajput, G.; Srivastava, M.; Yadav, R. Structural and vibrational characteristics and vibronic coupling of tetramethyltetraselenafulvalene. *Journal of Molecular Structure* **2019**, 1175, 1-12.
2. Wu, L.; Coppens, P.; Bu, X. Crystal structure of tetramethyltetraselenafulvalene nitrate,  $(C_{10}H_{12}Se_4)NO_3$ . *Zeitschrift für Kristallographie-New Crystal Structures* **1997**, 212, 101-102.
3. Rosokha, S.V.; Stern, C.L.; Ritzert, J.T.  $\pi$ -Bonded molecular wires: self-assembly of mixed-valence cation-radical stacks within the nanochannels formed by inert tetrakis [3, 5-bis (trifluoromethyl) phenyl] borate anions. *CrystEngComm* **2013**, 15, 10638-10647.
4. Sakata, M.; Yoshida, Y.; Maesato, M.; Saito, G.; Matsumoto, K.; Hagiwara, R. Preparation of superconducting  $(TMTSF)_2NbF_6$  by electrooxidation of TMTSF using ionic liquid as electrolyte. *Molecular Crystals and Liquid Crystals* **2006**, 452, 103-112.
5. Wudl, F. Three-dimensional structure of the superconductor  $(TMTSF)_2AsF_6$  and the spin-charge separation hypothesis. *J. Am. Chem. Soc.* **1981**, 103, 7064-7069.
6. Beno, M.; Blackman, G.; Williams, J.M.; Bechgaard, K. Synthetic metals based on tetramethyltetraselenafulvalene (TMTSF): Synthesis, structure ( $T = 298$  and  $125$  K), and novel properties of  $(TMTSF)_2H_2F_3$ . *Inorg. Chem.* **1982**, 21, 3860-3862.
7. Emge, T.J.; Beno, M.A.; Daws, C.A.; Wang, H.H.; Williams, J.M. Novel Structural Features, and their Relationship to the Electrical Properties, of the Organic Conductor  $(TMTSF)_2NO_3$  at  $298$  K and  $125$  K. *Molecular crystals and liquid crystals* **1984**, 116, 153-171.
8. Kazheva, O.N.; Kushch, N.D.; Dyachenko, O.A.; Canadell, E. Rare-earth elements in molecular conductors: Crystal and electronic structures. *Journal of Solid State Chemistry* **2002**, 168, 457-463.
